# Supplementary material for: Comparative Effectiveness of Needle Aponeurotomy and Collagenase Injection for Dupuytren’s Contracture: A Multicenter Study
Source: PubMed Central journal article supplement — Plast Reconstr Surg Glob Open. 2017 Sep 25;5(9):e1425. doi: 10.1097/GOX.0000000000001425 (PMC5640330; doi:10.1097/gox.0000000000001425), 2017-09-25
Supplement: gox-5-e1425-s001.pdf [file gox-5-e1425-s001.pdf]

| <b>Supplemental Table 1.</b> Characteristics of the matched patients, divided by those with (respondent) and without data (non-respondents) available on the primary outcome (degree of contracture). |                           |                              |          |
|-------------------------------------------------------------------------------------------------------------------------------------------------------------------------------------------------------|---------------------------|------------------------------|----------|
|                                                                                                                                                                                                       | <b>Respondent (N=118)</b> | <b>Non-respondent (N=12)</b> | <b>p</b> |
| <b>Demographics</b>                                                                                                                                                                                   |                           |                              |          |
| Age –yrs.                                                                                                                                                                                             | 63±8                      | 64±5                         | 0.978    |
| Male gender –%                                                                                                                                                                                        | 75                        | 67                           | 0.562    |
| Alcohol use –%                                                                                                                                                                                        | 64                        | 67                           | 0.999    |
| Current smoker –%                                                                                                                                                                                     | 17                        | 17                           | 0.999    |
| Epilepsy –%                                                                                                                                                                                           | 2                         | 0                            | 0.532    |
| <b>Disease characteristics</b>                                                                                                                                                                        |                           |                              |          |
| Tubiana –%                                                                                                                                                                                            |                           |                              | 0.179    |
| Grade I                                                                                                                                                                                               | 45                        | 50                           |          |
| Grade II                                                                                                                                                                                              | 50                        | 33                           |          |
| Grade III or IV                                                                                                                                                                                       | 5                         | 17                           |          |
| Recurrent disease –%                                                                                                                                                                                  | 21                        | 17                           | 0.999    |
| Positive family history –%                                                                                                                                                                            | 43                        | 67                           | 0.120    |
| <b>Outcomes</b>                                                                                                                                                                                       |                           |                              |          |
| Extension deficit –degrees†                                                                                                                                                                           |                           |                              |          |
| Total                                                                                                                                                                                                 | 62±30                     | 52±29                        | 0.053    |
| MCP joint level                                                                                                                                                                                       | 39±23                     | 29±24                        | 0.010    |
| PIP joint level                                                                                                                                                                                       | 20±21                     | 22±25                        | 0.498    |
| DIP joint level                                                                                                                                                                                       | 3±9                       | 1±4                          | 0.063    |
| * Plus-minus values are means ±SD.                                                                                                                                                                    |                           |                              |          |
| † Values are reported for all joints.                                                                                                                                                                 |                           |                              |          |
| MCP, metacarpophalangeal; PIP, proximal interphalangeal; DIP, distal interphalangeal; SD, standard deviation.                                                                                         |                           |                              |          |
